# Supplementary material
Source: PubMed Central journal article supplement (PMC6140556)
Supplement: CJN.13921217SupplementaryData.pdf [file CJN.13921217SupplementaryData.pdf]

*Supplemental material is neither peer-reviewed nor thoroughly edited by CJASN. The authors alone are responsible for the accuracy and presentation of the material.*

## **The Effect of Increasing Dialysate Magnesium on Serum Calcification Propensity in Subjects with End-Stage Kidney Disease**

### **A Randomized Controlled Clinical Trial**

Iain Bressendorff MD<sup>1,2</sup>, Ditte Hansen MD PhD<sup>2</sup>, Morten Schou MD PhD<sup>3</sup>, Andreas Pasch MD DMSc<sup>4,5</sup>, Lisbet Brandi MD DMSc<sup>1</sup>.

<sup>1</sup>Department of Cardiology, Nephrology, and Endocrinology, Nordsjællands Hospital, Hillerød, Denmark;

<sup>2</sup>Department of Nephrology, Herlev and Gentofte Hospital, Herlev, Denmark;

<sup>3</sup>Department of Cardiology, Herlev and Gentofte Hospital, Herlev, Denmark;

<sup>4</sup>University of Bern, Bern, Switzerland;

<sup>5</sup>Calciscon AG, Bern, Switzerland.

Supplemental material is neither peer-reviewed nor thoroughly edited by CJASN. The authors alone are responsible for the accuracy and presentation of the material.

| Supplementary Table S1                    | Standard Dialysate Mg | High Dialysate Mg |
|-------------------------------------------|-----------------------|-------------------|
| <u>Adverse events during intervention</u> |                       |                   |
| Death                                     |                       | 1                 |
| Ischemic stroke                           |                       | 1                 |
| Exit-site infection                       | 1                     |                   |
| Viral respiratory infection               | 1                     |                   |
| Pulmonary oedema                          | 1                     | 1                 |
| Pain in arteriovenous fistula             |                       | 1                 |
| Thrombosis in arteriovenous fistula       |                       | 1                 |
| Dialysis catheter malfunction             |                       | 1                 |
| Ankle fracture                            |                       | 1                 |
| Amputation of toe (necrotic foot ulcer)   |                       | 1                 |
| Pleural effusion                          | 1                     |                   |
| Seizure                                   |                       | 1                 |
| Total adverse events during intervention  | 4                     | 9                 |
| <u>Adverse events after intervention</u>  |                       |                   |
| Death                                     | 1                     | 1                 |
| Thrombosis in arteriovenous fistula       |                       | 1                 |
| Ischemic leg ulcer                        | 1                     |                   |
| Urinary tract infection                   |                       | 1                 |
| Psychosis                                 |                       | 1                 |
| Atrial fibrillation                       |                       | 1                 |
| Total adverse events after intervention   | 2                     | 5                 |
| Total adverse events during trial         | 6                     | 14                |

3 subjects died during the course of the trial:

- 1 old and co-morbid diabetic patient (control group) died in hospital after being admitted for pains from chronic leg ulcers.
- 1 frail and cachectic patient in functional decline (high magnesium group) died in his sleep at home. His serum magnesium was 3.22 mg/dL at the dialysis session immediately prior to his death.
- 1 very old subject (high magnesium group) died from a massive stroke which he suffered about 10 days after having completed the intervention and was thus treated with normal dialysate magnesium for 4 dialysis sessions before having his stroke.

We did not consider any of these deaths to be related to the intervention.
